# Supplementary material for: Evaluation of content knowledge and instructor impacts in a middle school outreach program: lessons from Brain Explorers
Source: Frontiers journal article supplement (doi:10.3389/feduc.2024.1446205), 2024-09-24
Supplement: Data_Sheet_1.PDF [file Data_Sheet_1.PDF]

# Lesson Title (Topic)

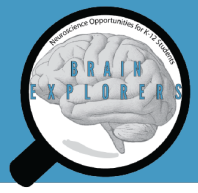

**Lesson Overview:**

**Lesson Author(s):**

**Age or Grade Level:**

**Delivery Format:** In-class / Science Fair / Virtual

**Instructional Time (min):**

**Number of Instructors Preferred (required): ## (##)**

**Next Generation Science Standard Addressed:**

| Performance Expectation                                                                                                                                                      |                               |                       |
|------------------------------------------------------------------------------------------------------------------------------------------------------------------------------|-------------------------------|-----------------------|
| <b>MS-LS1-8:</b> Gather and synthesize information that sensory receptors respond to stimuli by sending messages to the brain for immediate behavior or storage as memories. |                               |                       |
| Science and Engineering Practices                                                                                                                                            | Disciplinary Core Ideas       | Crosscutting Concepts |
| Obtaining, Evaluating, and Communicating Information                                                                                                                         | LS1.D: Information Processing | Cause and Effect      |

**Learning Objectives** (*what students will be able to do after the event*):

**Phenomenon/Driving Question** (*An observable event that can drive student inquiry*):

# Lesson Title (Topic)

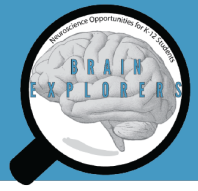

## Teacher Preparation:

| Anticipated Student Misconceptions                                              | Scientific Vocabulary                                                           |
|---------------------------------------------------------------------------------|---------------------------------------------------------------------------------|
| <i>Potential student ideas that are problematic when engaging in the lesson</i> | <i>New vocabulary students should be familiar with by the end of the lesson</i> |
|                                                                                 |                                                                                 |

## Preparation Resources for Instructors

*List any Youtube videos, articles, etc that may help the instructors prepare to teach this event*

**Materials:** *List ALL materials needed for this event including consumables, hardware, and worksheets.*

| Group/Class Needs | Individual Student Needs |
|-------------------|--------------------------|
|                   |                          |

*Attach any presentations and/or worksheets as well as activity walk-throughs for instructors.*

# Lesson Title (Topic)



## Timeline:

*Below is an example*

*Introductions -5 minutes*

*Presentation -5 minutes*

*Focus on content for Learning Objectives*

*Description of Activities X, Y, Z*

*Activity Round 1 – 10 minutes*

*Group 1 – Activity X (Learning objective #1)*

*Group 2 – Activity Y (Learning objective #2)*

*Group 3 – Activity Z (Learning objective #3)*

*Activity Round 2 – 10 minutes*

*Group 1 – Activity Y*

*Group 2 – Activity Z*

*Group 3 – Activity X*

*Activity Round 3 – 10 minutes*

*Group 1 – Activity Z*

*Group 2 – Activity X*

*Group 3 – Activity Y*

*Formative Assessment/Debrief – 10 minutes*

*(Activity sheet, Venn diagram, summary, exit ticket, think-pair-share, etc. to check for understanding of lesson concepts)*
